# Supplementary material for: Modeling the Adsorption of the miR-29a Cancer Biomarker on a Graphene Quantum Dot
Source: PubMed Central journal article supplement — ACS Omega. 2021 Aug 9;6(33):21764–72. doi: 10.1021/acsomega.1c03404 (PMC8388069; doi:10.1021/acsomega.1c03404), 2021-08-09
Supplement: ao1c03404_si_001.pdf [file ao1c03404_si_001.pdf]

## Supplementary Information

### Modelling the adsorption of miR-29a cancer biomarker on a graphene quantum dot

Nattapon Kuntip<sup>1</sup>, Deanpen Japrun<sup>2\*</sup>, and Prapasiri Pongprayoon<sup>1,3\*</sup>

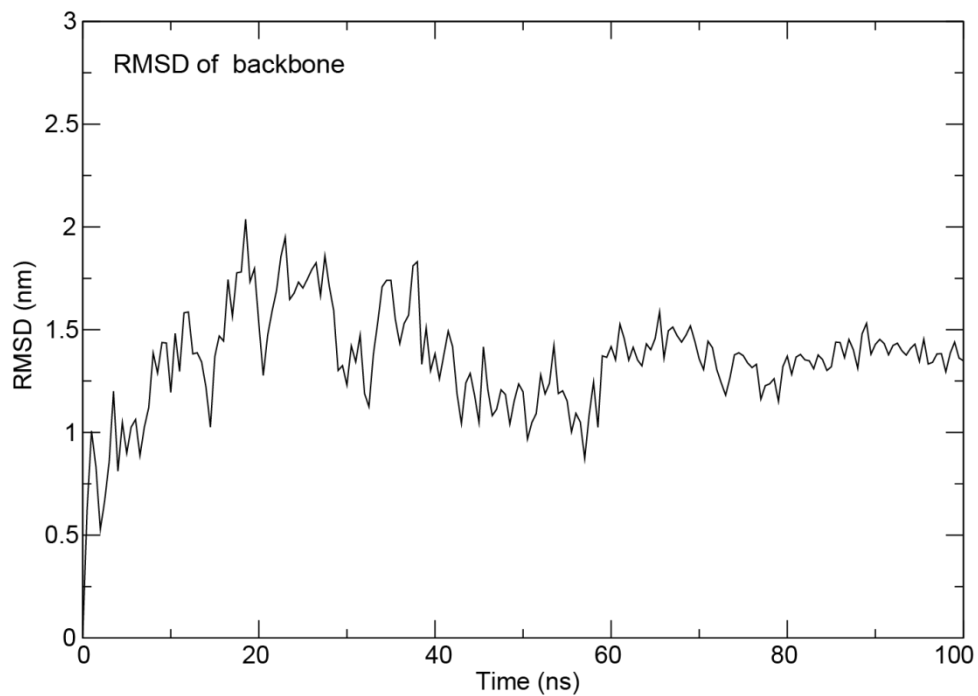

**Figure S1** RMSD of miR-29a backbone in the step of 3D structure modelling

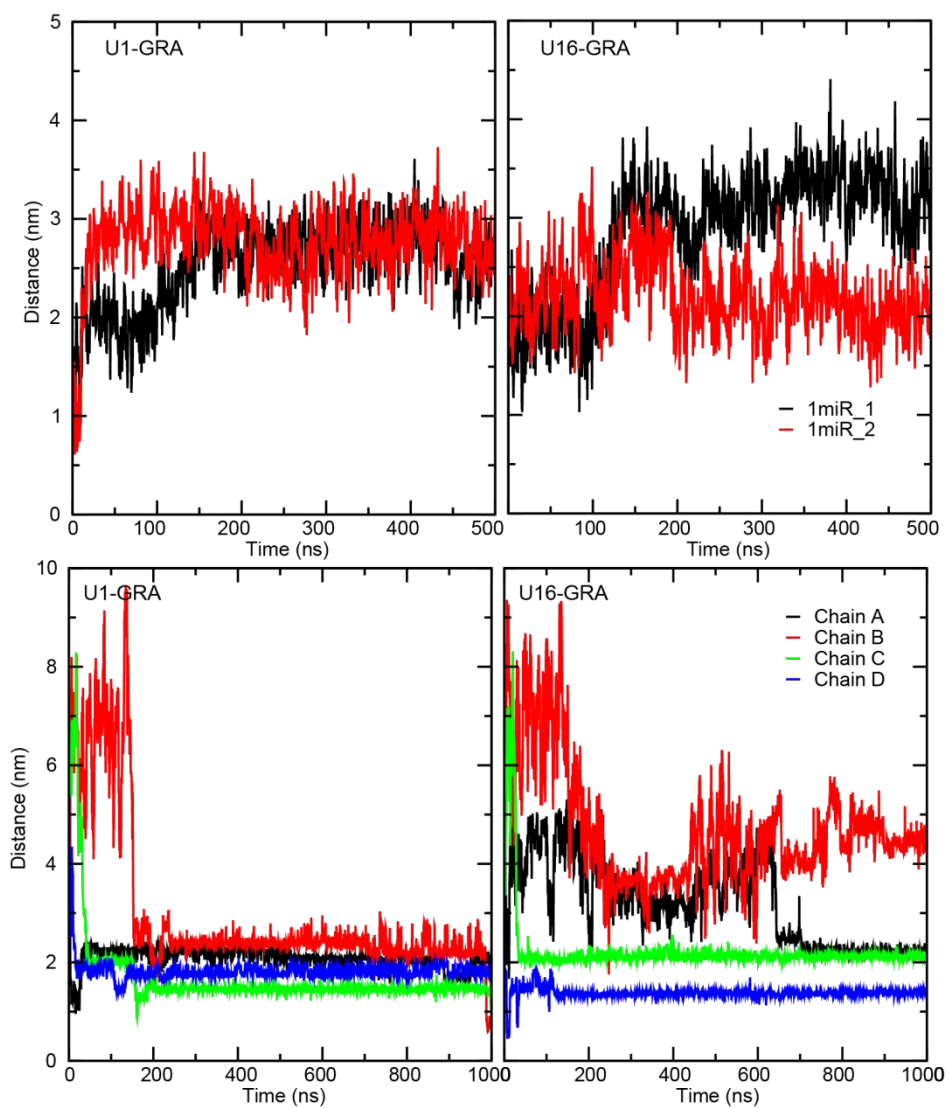

**Figure S2** Distances of U1-GRA and U16-GRA in all systems. U1 is a representative of the 5' terminus.

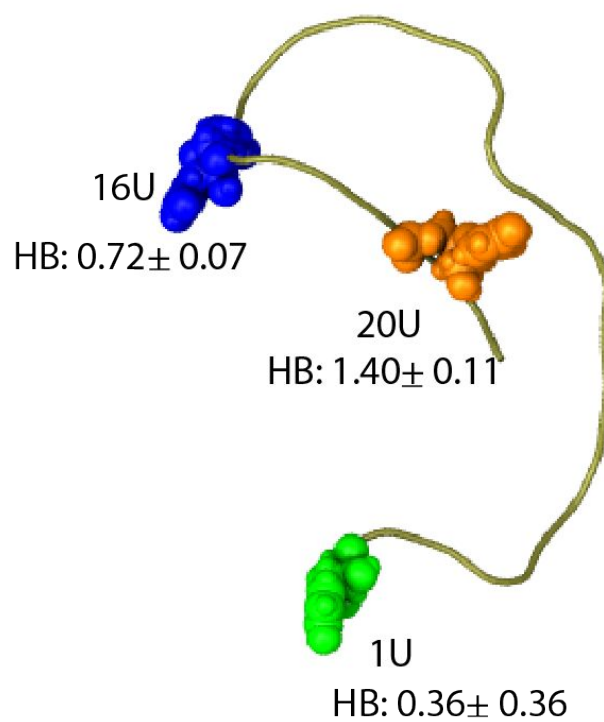

**Figure S3** Structure of miR-29a molecules with uracil (U) at position 1, 16, and 20. The hydrogen bond between each uracil and its chain are also shown with standard deviation. U20 serves as a reference that can form hydrogen bonds within a chain.

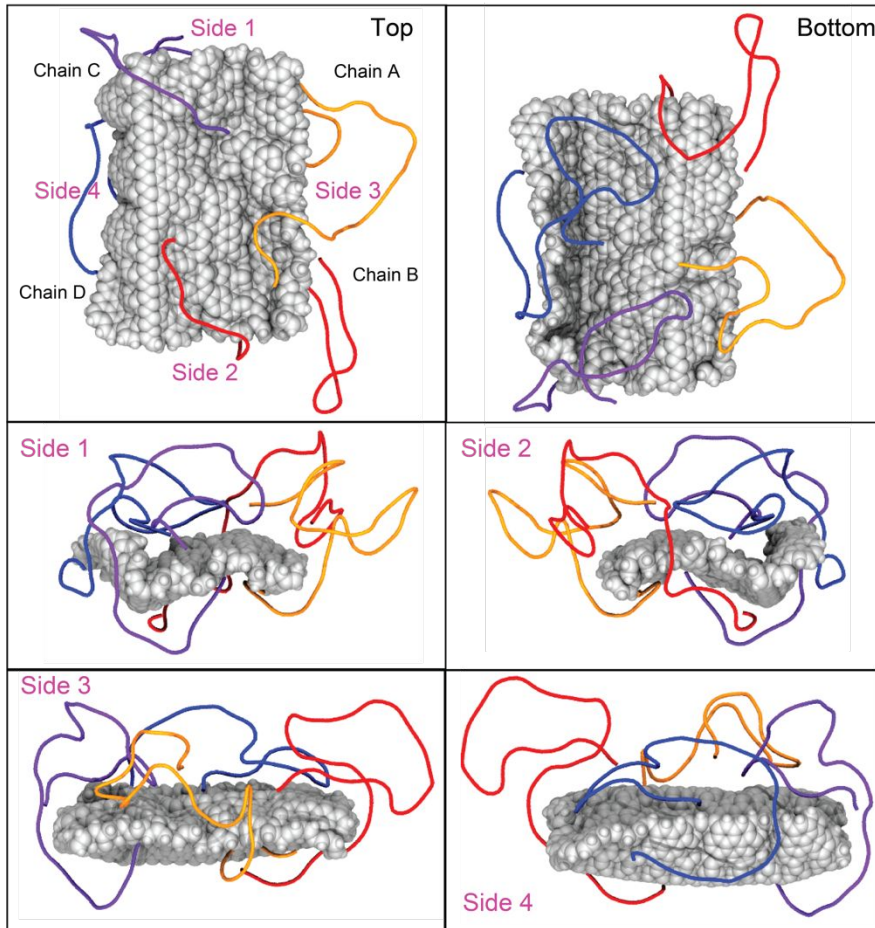

**Figure S4** Conformations of four miR-29a chains on GRA surface in 4miR system.
